# Supplementary material for: Universal Health Coverage and The Pacific Islands: Challenges Faced and Priority Responses, 2015-2020
Source: Research Square preprint supplement (doi:10.21203/rs.3.rs-596737/v1), 2021-06-15
Supplement: Supplementary file 2 [file 022ef9643a8f65c410d21238.docx]

**Supplementary file 1. Literature search strategy (OVID)**

universal health insurance/ OR (“universal health” OR UHC).mp

1. pacific islands/ OR exp melanesia/ OR exp micronesia/ OR exp polynesia/
2. (“american samoa” OR “cook islands” OR (“federated states of micronesia” OR Micronesia OR FSM OR yap OR chuuk OR kosrae OR phonpei) OR fiji OR (“french polynesia” OR “polynesie francaise”) OR guam OR kiribati OR (“marshall islands” OR RMI) OR nauru OR (“new caledonia” OR “novelle caledonie”) OR niue OR (“northern mariana islands” OR CNMI) OR palau OR (“papua new guinea” or PNG) OR pitcairn OR (samoa OR “samoan islands”) OR “solomon islands” OR tokelau OR tonga OR tuvalu OR vanuatu OR (“wallis and futuna” or “wallis et fatuna”)).mp.

2 and 3

1 and 4
